# Supplementary material for: Mechanism of action of sprG1-encoded type I toxins in Staphylococcus aureus: from membrane alterations to mesosome-like structures formation and bacterial lysis
Source: PubMed Central journal article supplement (PMC10579593; doi:10.3389/fmicb.2023.1275849), 2023-10-03
Supplement: Data_Sheet_1.pdf [file Data_Sheet_1.pdf]

**Supplementary Table 1. Strains used in this study.**

| Strains                          | Relevant characteristics                                                                                                                                                                                | References                       |
|----------------------------------|---------------------------------------------------------------------------------------------------------------------------------------------------------------------------------------------------------|----------------------------------|
| <b><i>E. coli</i> strain</b>     |                                                                                                                                                                                                         |                                  |
| XL1 blue                         | $\Delta(\text{ara-leu})$ 7697 araD139 fhuA $\Delta\text{lacX74}$<br>galK16 galE15 e14- $\phi$ 80dlacZ $\Delta$ M15 recA1<br>relA1 endA1 nupG rpsL (StrR) rph spoT1<br>$\Delta(\text{mrr-hsdRMS-mcrBC})$ |                                  |
| <b><i>S. aureus</i> strains</b>  |                                                                                                                                                                                                         |                                  |
| RN4220                           | Restriction-defective derivative of 8325-4                                                                                                                                                              | Kreiswirth <i>et al.</i> , 1983  |
| N315                             | Methicillin-resistant <i>S aureus</i> (MRSA) strain isolated in 1982 from the pharyngeal smear of a Japanese patient                                                                                    | Okonogi <i>et al.</i> , 1989     |
| N315_ $\Delta\text{sprG1/sprF1}$ | N315 strain deleted for <i>sprG1</i> and <i>sprF1</i>                                                                                                                                                   | Pinel-Marie <i>et al.</i> , 2014 |

**Supplementary Table 2. Plasmids used in this study.**

| Plasmids                                                                                  | Relevant characteristics                                                                                                                                                                                                                                                                                                                                                                | References                   |
|-------------------------------------------------------------------------------------------|-----------------------------------------------------------------------------------------------------------------------------------------------------------------------------------------------------------------------------------------------------------------------------------------------------------------------------------------------------------------------------------------|------------------------------|
| pALC2073                                                                                  | Multicopy shuttle vector with the tetracycline-inducible P <sub>xyI/tetO</sub> promoter and with Cat <sup>R</sup> in <i>S. aureus</i>                                                                                                                                                                                                                                                   | Bateman <i>et al.</i> , 2001 |
| pALC2073Ω <i>sprG1</i> <sub>312</sub> / <i>sprF1</i>                                      | pALC2073 with <i>sprG1</i> <sub>312</sub> under the control of tetracycline-inducible P <sub>xyI/tetO</sub> promoter and with <i>sprF1</i> under the control of its endogenous promoter                                                                                                                                                                                                 | This study                   |
| pALC2073Ω <i>sprG1</i> <sub>312</sub> - <i>STOP</i> <sub>1</sub> / <i>sprF1</i>           | pALC2073Ω <i>sprG1</i> <sub>312</sub> / <i>sprF1</i> with the first AUG codon, encoding to the methionine M <sub>1</sub> , mutated to the UAA codon                                                                                                                                                                                                                                     | This study                   |
| pALC2073Ω <i>sprG1</i> <sub>312</sub> - <i>M14A/sprF1</i>                                 | pALC2073Ω <i>sprG1</i> <sub>312</sub> / <i>sprF1</i> with the second AUG codon, encoding to the methionine M <sub>14</sub> , mutated to the GCC alanine codon                                                                                                                                                                                                                           | This study                   |
| pALC2073Ω <i>sprG1</i> <sub>312</sub> - <i>M14A</i>                                       | pALC2073 with <i>sprG1</i> <sub>312</sub> with the second AUG codon, encoding to the methionine M <sub>14</sub> , mutated to the GCC alanine codon                                                                                                                                                                                                                                      | This study                   |
| pALC2073Ω <i>sprG1</i> <sub>312</sub> - <i>STOP</i> <sub>1,2,14</sub> / <i>sprF1</i>      | pALC2073Ω <i>sprG1</i> <sub>312</sub> / <i>sprF1</i> with<br>-the first and the second AUG codon, encoding to the methionine M <sub>1</sub> and M <sub>14</sub> , mutated to the UAA stop codon<br>- the first GUG codon, encoding to the valine V2, mutated to the UAA stop codon                                                                                                      | This study                   |
| pALC2073Ω <i>sprG1</i> <sub>312</sub> - <i>STOP</i> <sub>1,2,14,17</sub> / <i>sprF1</i>   | pALC2073Ω <i>sprG1</i> <sub>312</sub> / <i>sprF1</i> with<br>-the first and the second AUG codon, encoding to the methionine M <sub>1</sub> and M <sub>14</sub> , mutated to the UAA stop codon<br>- the first GUG codon, encoding to the valine V2, mutated to the UAA stop codon<br>-the second ATT codon, encoding to the isoleucine I <sub>17</sub> , mutated to the UAA stop codon | This study                   |
| pALC2073Ω <i>sprG1</i> <sub>312</sub> - <i>3XFlag-Ct/sprF1</i>                            | pALC2073Ω <i>sprG1</i> <sub>312</sub> / <i>sprF1</i> with a 3XFLAG sequence before the termination codon of the internal coding sequence of SprG1 <sub>312</sub>                                                                                                                                                                                                                        | This study                   |
| pALC2073Ω <i>sprG1</i> <sub>312</sub> - <i>3XFlag-Ct-STOP</i> <sub>1</sub> / <i>sprF1</i> | pALC2073Ω <i>sprG1</i> <sub>312</sub> - <i>3XFlag-Ct/sprF1</i> with the first AUG codon, encoding to the methionine M <sub>1</sub> , mutated to the UAA codon                                                                                                                                                                                                                           | This study                   |

|                                                                                            |                                                                                                                                                                                                                                                                                                                                                                                            |            |
|--------------------------------------------------------------------------------------------|--------------------------------------------------------------------------------------------------------------------------------------------------------------------------------------------------------------------------------------------------------------------------------------------------------------------------------------------------------------------------------------------|------------|
| pALC2073 $\Omega$ sprG1 <sub>312</sub> -<br>3XFlag-Ct-M14A/sprF1                           | pALC2073 $\Omega$ sprG1 <sub>312</sub> -3XFlag-Ct/sprF1 with the second AUG codon, encoding to the methionine M <sub>14</sub> , mutated to the GCC alanine codon                                                                                                                                                                                                                           | This study |
| pALC2073 $\Omega$ sprG1 <sub>312</sub> -<br>3XFlag-Ct-STOP <sub>1,2,14</sub> /sprF1        | pALC2073 $\Omega$ sprG1 <sub>312</sub> -3XFlag-Ct/sprF1 with<br>-the first and the second AUG codon, encoding to the methionine M <sub>1</sub> and M <sub>14</sub> , mutated to the UAA stop codon<br>- the first GUG codon, encoding to the valine V2, mutated to the UAA stop codon                                                                                                      | This study |
| pALC2073 $\Omega$ sprG1 <sub>312</sub> -<br>3XFlag-Ct-<br>STOP <sub>1,2,14,17</sub> /sprF1 | pALC2073 $\Omega$ sprG1 <sub>312</sub> -3XFlag-Ct/sprF1 with<br>-the first and the second AUG codon, encoding to the methionine M <sub>1</sub> and M <sub>14</sub> , mutated to the UAA stop codon<br>- the first GUG codon, encoding to the valine V2, mutated to the UAA stop codon<br>-the second ATT codon, encoding to the isoleucine I <sub>17</sub> , mutated to the UAA stop codon | This study |
| pALC2073 $\Omega$ sprG1 <sub>312</sub> -<br>STOP <sub>1</sub> - $\Delta$ 9/sprF1           | pALC2073 $\Omega$ sprG1 <sub>312</sub> -STOP <sub>1</sub> /sprF1 with the AAG codon, encoding to the lysine K23, mutated to the UAA stop codon                                                                                                                                                                                                                                             | This study |
| pALC2073 $\Omega$ sprG1 <sub>312</sub> -<br>STOP <sub>1</sub> - $\Delta$ 2/sprF1           | pALC2073 $\Omega$ sprG1 <sub>312</sub> -STOP <sub>1</sub> /sprF1 with the AAA codon, encoding to the lysine K30, mutated to the UAA stop codon                                                                                                                                                                                                                                             | This study |
| pALC2073 $\Omega$ sprG1 <sub>312</sub> -<br>STOP <sub>1</sub> -K2K3/sprF1                  | pALC2073 $\Omega$ sprG1 <sub>312</sub> -STOP <sub>1</sub> - $\Delta$ 2/sprF1 with two AAA codons, encoding to two lysine, added after the first AUG codon of SprG1 <sub>31</sub> peptide                                                                                                                                                                                                   | This study |
| pALC2073 $\Omega$ sprG1 <sub>312</sub> -<br>STOP <sub>1</sub> -F10A-F13A/sprF1             | pALC2073 $\Omega$ sprG1 <sub>312</sub> -STOP <sub>1</sub> /sprF1 with the two codons UUC, encoding to the two phenylalanine F10 and F13, mutated to the GCA alanine codon                                                                                                                                                                                                                  | This study |
| pALC2073 $\Omega$ sprG1 <sub>312</sub> -<br>STOP <sub>1</sub> -F10E-F13E/sprF1             | pALC2073 $\Omega$ sprG1 <sub>312</sub> -STOP <sub>1</sub> /sprF1 with the two codons UUC, encoding to the two phenylalanine F10 and F13, mutated to the GAA glutamic acid codon                                                                                                                                                                                                            | This study |
| pALC2073 $\Omega$ sprG1 <sub>312</sub> -STOP <sub>1</sub> -<br>1XFlag-Nt/sprF1             | pALC2073 $\Omega$ sprG1 <sub>312</sub> -STOP <sub>1</sub> /sprF1 with a 1XFLAG sequence after the first AUG codon of SprG1 <sub>31</sub> peptide                                                                                                                                                                                                                                           | This study |
| pALC2073 $\Omega$ sprG1 <sub>312</sub> -STOP <sub>1</sub> -<br>1XFlag-Ct/sprF1             | pALC2073 $\Omega$ sprG1 <sub>312</sub> -STOP <sub>1</sub> /sprF1 with a 1XFLAG sequence before the termination codon of the internal coding sequence of SprG1 <sub>312</sub>                                                                                                                                                                                                               | This study |

**Supplementary Table 3. DNA primers used in this study.**

| <b>Genetic constructions</b>                                      |                                                                                                                                                                                                                                  |                                                                                                                                                                                                                                                                                                                                                                   |
|-------------------------------------------------------------------|----------------------------------------------------------------------------------------------------------------------------------------------------------------------------------------------------------------------------------|-------------------------------------------------------------------------------------------------------------------------------------------------------------------------------------------------------------------------------------------------------------------------------------------------------------------------------------------------------------------|
| <i>DNA</i>                                                        | <i>Sequences</i>                                                                                                                                                                                                                 | <i>Purposes</i>                                                                                                                                                                                                                                                                                                                                                   |
| SprG1 <sub>311</sub> <b>KpnI</b> _forw<br>SprG1 <b>EcoRI</b> _rev | ATCGGGTACCCTTTGAGCAAGTTGGATAGATGGTGGCTAT<br>ATCGGAATTCGAAAAAGGGCAACATGCGCAAACAT                                                                                                                                                  | pALCΩsprG1 <sub>312</sub>                                                                                                                                                                                                                                                                                                                                         |
| SprG1311pALCKpnI_forw<br>SprG1SprF1EcoRI_rev                      | ATCGGGTACCCTTTGAGCAAGTTGGATAGATGGTGGCTAT<br>ATCGGAATTCAAAAGACGACTAATAAGCCGTCTAT                                                                                                                                                  | pALCΩsprG1 <sub>312</sub> /sprF1                                                                                                                                                                                                                                                                                                                                  |
| SprG1- <b>STOP1</b> _forw<br>SprG1- <b>STOP1</b> _rev             | AAGGAGGTGGTGCCTT <b>TA</b> AGTGGCATTACTGAAA<br>TTTCAGTAATGCCACT <b>TA</b> AGGCACCACCTCCTT                                                                                                                                        | pALCΩsprG1 <sub>312</sub> -<br>STOP <sub>1</sub> /sprF1                                                                                                                                                                                                                                                                                                           |
| SprG1- <b>M14A</b> _forw<br>SprG1- <b>M14A</b> _rev               | TAGAAAGGAGACGCCTA <b>GCC</b> ATTACAATTAGTACCATG<br>CATGGTACTAATTGTAAT <b>GGC</b> TAGGCGTCTCCTTTCTA                                                                                                                               | pALCΩsprG1 <sub>312</sub> -<br>M14A/sprF1                                                                                                                                                                                                                                                                                                                         |
| SprG1- <b>STOP1,2,14</b> _forw<br>SprG1- <b>STOP1,2,14</b> _rev   | AAGGAGGTGGTGCCT <b>TAATA</b> AGCATTACTGAAATCTTTAGA-<br>AGGAGACGCCTA <b>TAA</b> ATTACAATTAGTACCATG<br>CATGGTACTAATTGTAAT <b>TTA</b> TAGGCGTCTCCTTTCTAAAGAT<br>T-TCAGTAATGCT <b>TTATTA</b> AGGCACCACCTCCTT                         | pALCΩsprG1 <sub>312</sub> -<br>STOP <sub>1,2,14</sub> /sprF1                                                                                                                                                                                                                                                                                                      |
| SprG1- <b>STOP17</b> _forw<br>SprG1- <b>STOP17</b> _rev           | GCCTATAAATTACAT <b>TAA</b> AGTACCATGTTGC<br>GCAACATGGTACT <b>TTA</b> TGTAATTTATAGGC                                                                                                                                              | pALCΩsprG1 <sub>312</sub> -<br>STOP <sub>1,2,14,17</sub> /sprF1                                                                                                                                                                                                                                                                                                   |
| SprG1-Flag3XCter_forw<br>SprG1-Flag3XCter_rev                     | <u>GACTACAAAGACCATGACGGTGATTATAAAGATCATGACATCGAC</u><br><u>TACAAGGATGACGATGACAAGTAACCATCGCTAACTTTGGCTG</u><br>GTTT<br><u>CTTGTCATCGTCATCCTTGTAGTCGATGTCATGATCTTTATAATCA</u><br><u>CCGTCATGGTCTTTGTAGTC</u> TTTTTTATTGCTTAATTCAAT | pALCΩsprG1 <sub>312</sub> -<br>3XFlag-Ct/sprF1<br>pALC2073ΩsprG1 <sub>312</sub> -<br>3XFlag-Ct-<br>STOP <sub>1</sub> /sprF1<br>pALC2073ΩsprG1 <sub>312</sub> -<br>3XFlag-Ct-<br>M14A/sprF1<br>pALC2073ΩsprG1 <sub>312</sub> -<br>3XFlag-Ct-<br>STOP <sub>1,2,14</sub> /sprF1<br>pALC2073ΩsprG1 <sub>312</sub> -<br>3XFlag-Ct-<br>STOP <sub>1,2,14,17</sub> /sprF1 |

|                        |                                                                         |                                                         |
|------------------------|-------------------------------------------------------------------------|---------------------------------------------------------|
| SprG1- $\Delta$ 9_forw | GGTCTAGTAATCT <u>TA</u> ACTTATTGAATT                                    | pALC2073 $\Omega$ sprG1 <sub>312</sub> -                |
| SprG1- $\Delta$ 9_rev  | AATTCATAAAGTTAGAT <u>TT</u> ACTAGACC                                    | STOP <sub>1</sub> - $\Delta$ 9/sprF1                    |
| SprG1- $\Delta$ 2_forw | GAATTAAGCAAT <u>TAAAA</u> ATAACCATCGC                                   | pALC2073 $\Omega$ sprG1 <sub>312</sub> -                |
| SprG1- $\Delta$ 2_rev  | GCGATGGTTATTT <u>TTA</u> ATTGCTTAATTC                                   | STOP <sub>1</sub> - $\Delta$ 2/sprF1                    |
| SprG1-F10A-F13A_forw   | GTTGCAG <u>GC</u> AGGTTTAG <u>CA</u> CTTATTG                            | pALC2073 $\Omega$ sprG1 <sub>312</sub> -                |
| SprG1-F10A-F13A_rev    | CAATAAG <u>TG</u> CTAAACCT <u>GC</u> CTGCAAC                            | STOP <sub>1</sub> -F10A-<br>F13A/sprF1                  |
| SprG1-F10E-F10E_forw   | GTTGCAG <u>GA</u> AGGTTTAG <u>AA</u> CTTATTGC                           | pALC2073 $\Omega$ sprG1 <sub>312</sub> -                |
| SprG1-F10E-F10E_rev    | GCAATAAG <u>TT</u> CTAAACCT <u>TT</u> CCTGCAAC                          | STOP <sub>1</sub> -F10E-<br>F13E/sprF1                  |
| SprG1-K2K3_forw        | GGAGACGCCTAATG <u>AAAAAA</u> ATTACAATTAG                                | pALC2073 $\Omega$ sprG1 <sub>312</sub> -                |
| SprG1-K2K3_rev         | CTAATTGTAAT <u>TTTTTT</u> CATTAGGCGTCTCC                                | STOP <sub>1</sub> -K <sub>2</sub> K <sub>3</sub> /sprF1 |
| SprG1-Flag1XNter_forw  | CGCCTAATG <u>GACTACAAAGACGATGACGACAAG</u> ATT                           | pALC2073 $\Omega$ sprG1 <sub>312</sub> -                |
| SprG1-Flag1XNter_rev   | ACAATTAG<br>CTAATTGTAAT <u>CTTGTCGTCATCGTCTTTGTAGTCCA</u><br>TTAGGCG    | STOP <sub>1</sub> 1XFlag-<br>Nt/sprF1                   |
| SprG1-Flag1XCter_forw  | GCAATAAAAAA <u>GACTACAAAGACGATGACGACAAG</u>                             | pALC2073 $\Omega$ sprG1 <sub>312</sub> -                |
| SprG1-Flag1XCter_rev   | TAACCATCGC<br>GCGATGGTTA <u>CTTGTCGTCATCGTCTTTGTAGTCTT</u><br>TTTTATTGC | STOP <sub>1</sub> 1XFlag-<br>Ct/sprF1                   |

| <b>Northern blot</b> |                            |                                   |
|----------------------|----------------------------|-----------------------------------|
| <i>DNA</i>           | <i>Sequences</i>           | <i>Purposes</i>                   |
| SprG1-NB             | CAGCCAAAGTTAGCGATGGT       | Detection of sprG1 <sub>312</sub> |
| SprF1-NB             | TAACTTTGGCTGGTTTCGATGGTT   | Detection of SprF1                |
| ARN5S - NB           | CGTAAGTTCGACTACATCG        | Detection of 5S rRNA              |
| FLAG-NB              | ATCCTTGTAGTCGATGTCATGATCTT | Detection of flagged<br>RNAs      |

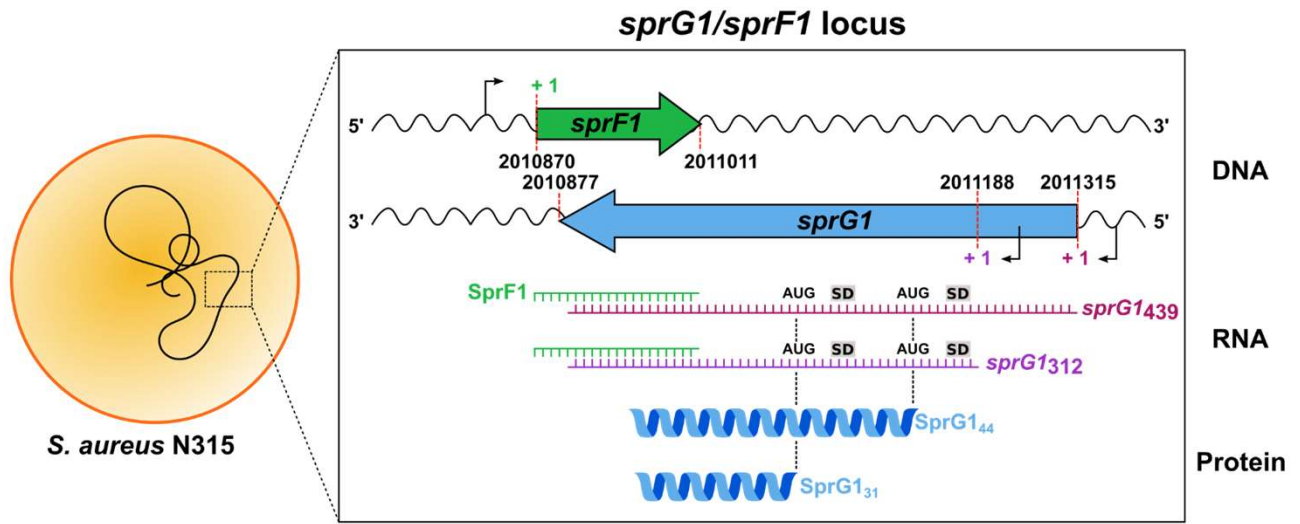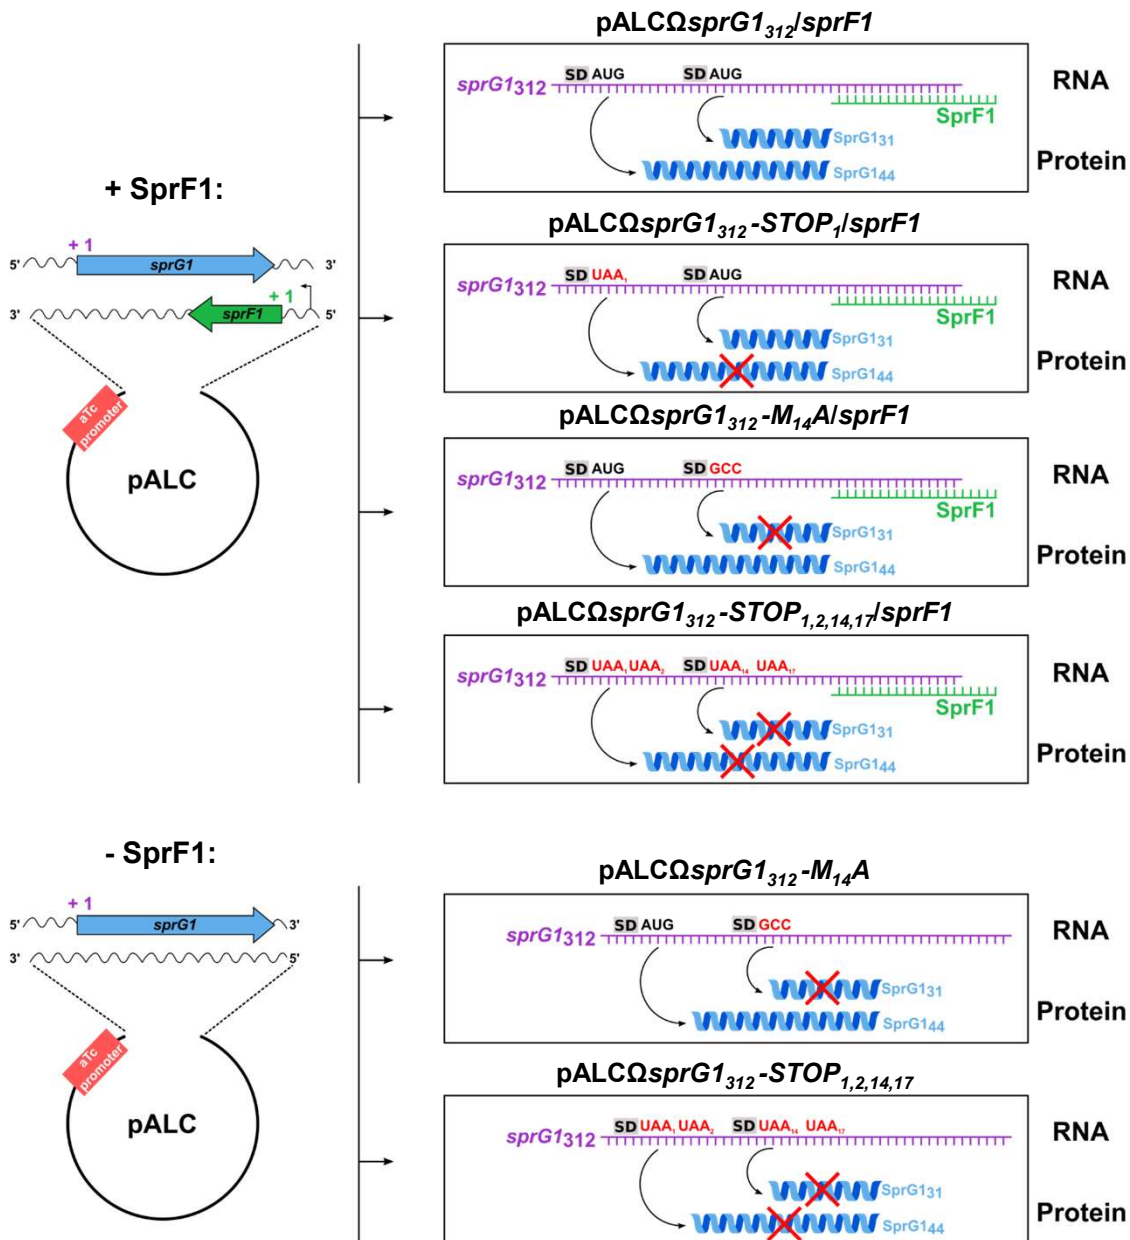

**Supplementary Figure 1: Genetic map of the wild-type *sprG1/sprF1* locus and the various constructs in the pALC vector used in this work.** The AUG54, GUG57 and AUG93 initiation codons and the AUU102 isoleucine codon were replaced with a UAA termination codon that refers to STOP<sub>1</sub>, STOP<sub>2</sub>, STOP<sub>14</sub> and STOP<sub>17</sub> mutations respectively. The AUG93 initiation codon was replaced with a GCC alanine codon that refers to M14A mutation.

CUUUGAGCAAGUUGGAUAGAUGGGUGGCUAUCU  
 20  
 GAGUAUAAGGAGGGUGGCCU **AUGGUGGCAU**  
 40 60  
 STOP<sub>1</sub> STOP<sub>2</sub>  
 UACUGAAAUCUUUAGAAAGGAGACGCCUA **AUG**  
 80 M14A/STOP<sub>14</sub>  
 AUUACA **AUU** AGUACCAUGUUGCAGUUUGGUUU  
 100 120  
 STOP<sub>17</sub>  
 AUUCCUUAUUGCAUUGAUAGGUCUAGUAAUCA  
 140  
 AGCUUAUUGAAUUAAGCAAUAAAAAAUAACCA  
 160 180  
 UCGCUAACUUUGGCUGGUUUCGAUGGUUAAAU  
 200 220  
 GGUUAUUAAUUUAAUCUUUAAUCUAAAAUAGC  
 240  
 CACCGUCUUUUUAAACGGGCUCACUAGGGUAAC  
 260 280  
 AUGUUUGCGCAUGUUGCCCUUUUUC  
 300

**Supplementary Figure 2: The *sprG1*<sub>312</sub> mRNA sequence.** The open reading frame is highlighted in grey. The AUG54, GUG57 and AUG93 initiation codons and the AUU102 isoleucine codon were replaced with a UAA termination codon that refers to STOP<sub>1</sub>, STOP<sub>2</sub>, STOP<sub>14</sub> and STOP<sub>17</sub> mutations respectively. The AUG93 initiation codon was replaced with a GCC alanine codon that refers to M14A mutation.

A

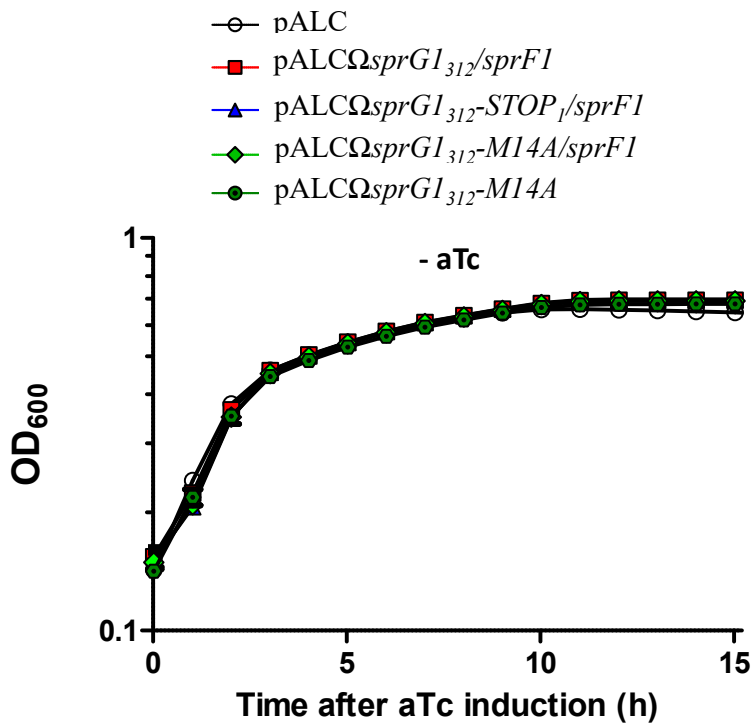

B

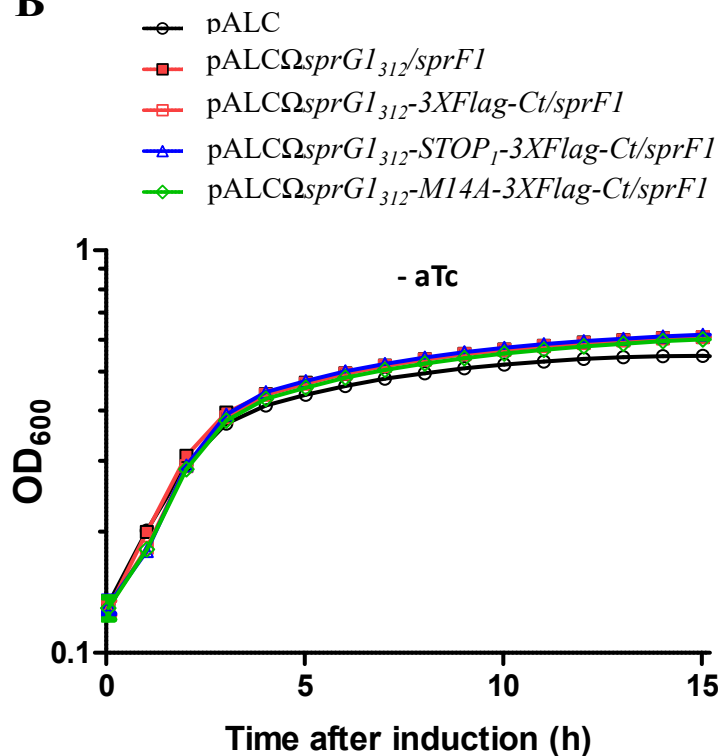

C

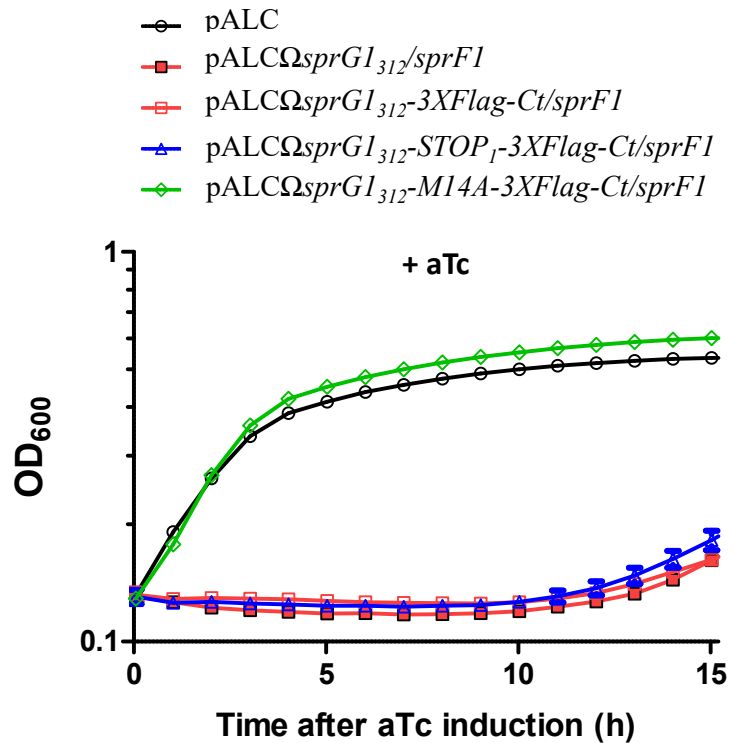

D

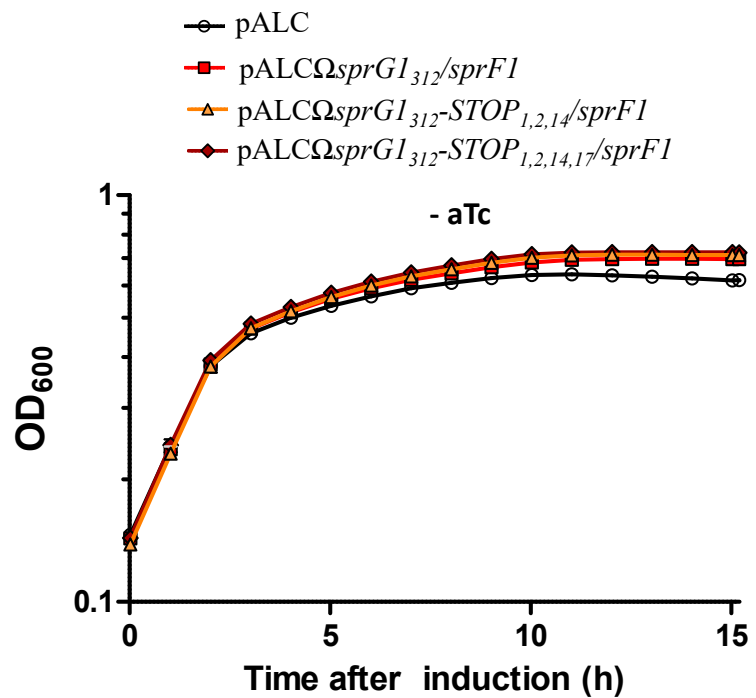

**Supplementary Figure 3: Growth kinetics of *Staphylococcus aureus* strains.** (A) Growth kinetics of *S. aureus* N315Δ*sprG1/sprF1* strains carrying pALC, pALCΩ*sprG1*<sub>312</sub>/*sprF1*, pALCΩ*sprG1*<sub>312</sub>-*STOP*<sub>1</sub>/*sprF1*, pALCΩ*sprG1*<sub>312</sub>-*M14A*/*sprF1* or pALCΩ*sprG1*<sub>312</sub>-*M14A* cultivated in MH medium in the absence of aTc. (B) Growth kinetics of *S. aureus* N315Δ*sprG1/sprF1* strains carrying pALC, pALCΩ*sprG1*<sub>312</sub>/*sprF1*, pALCΩ*sprG1*<sub>312</sub>-3*XFlag*-*Ct*/*sprF1*, pALCΩ*sprG1*<sub>312</sub>-*STOP*<sub>1</sub>-3*XFlag*-*Ct* /*sprF1* or pALCΩ*sprG1*<sub>312</sub>-*M14A*-3*XFlag*-*Ct*/*sprF1* cultivated in MH medium until the exponential growth phase and incubated in the presence of 0.25 μM aTc. (C) Growth kinetics of *S. aureus* N315Δ*sprG1/sprF1* strains carrying pALC, pALCΩ*sprG1*<sub>312</sub>/*sprF1*, pALCΩ*sprG1*<sub>312</sub>-*STOP*<sub>1,2,14</sub>/*sprF1* or pALCΩ*sprG1*<sub>312</sub>-*STOP*<sub>1,2,14,17</sub>/*sprF1* cultivated in MH medium in the absence of aTc. (D) Growth kinetics of *S. aureus* N315Δ*sprG1/sprF1* strains carrying pALC, pALCΩ*sprG1*<sub>312</sub>/*sprF1*, pALCΩ*sprG1*<sub>312</sub>-3*XFlag*-*Ct*/*sprF1*, pALCΩ*sprG1*<sub>312</sub>-*STOP*<sub>1</sub>-3*XFlag*-*Ct*/*sprF1* or pALCΩ*sprG1*<sub>312</sub>-*M14A*-3*XFlag*-*Ct*/*sprF1* cultivated in MH medium in the absence of aTc. Error bars show the means and standard deviations of three biological replicates (n=3).



**A**

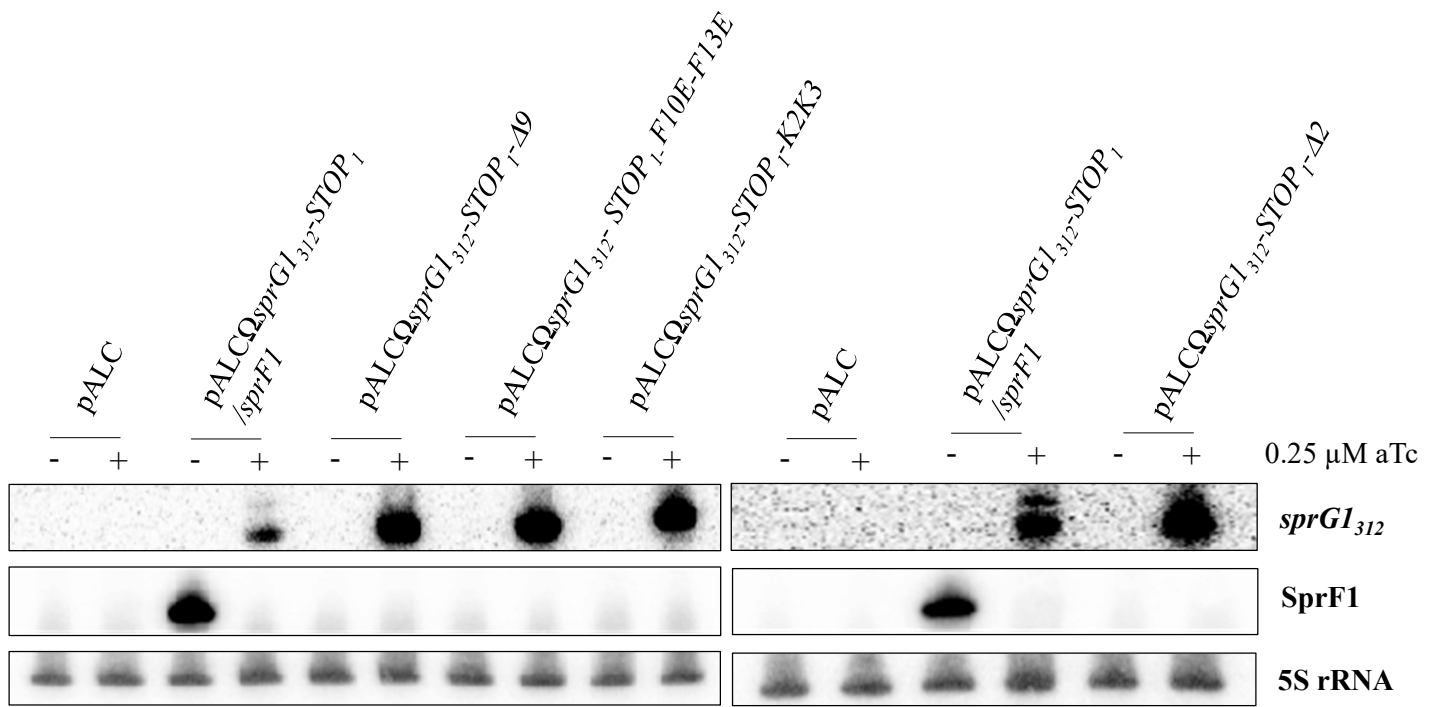

**B**

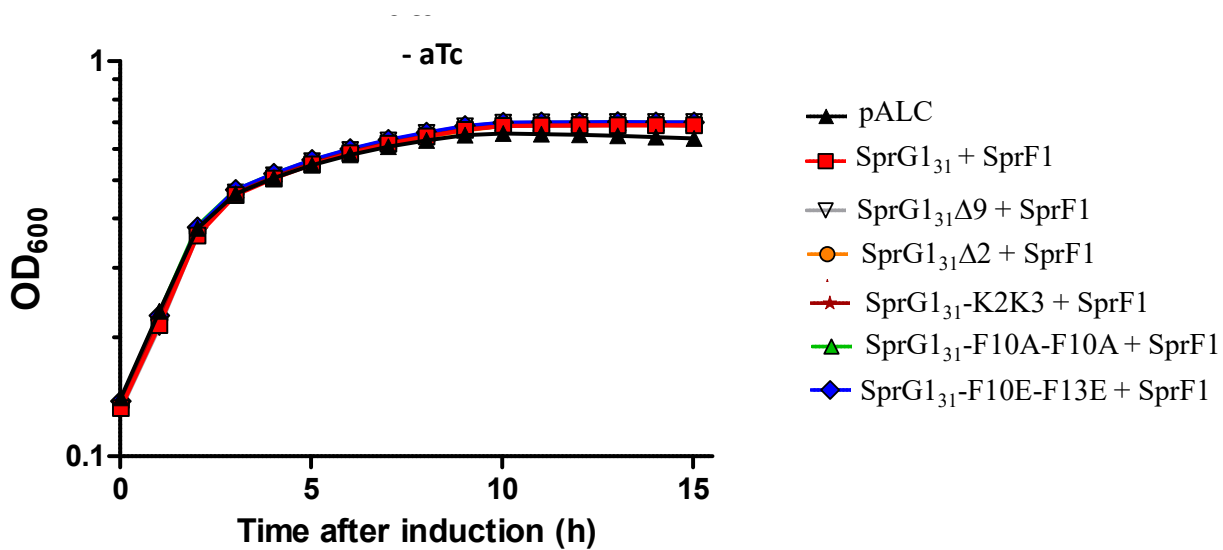

**Supplementary Figure 4: Northern blot analysis of *sprG1*<sub>312</sub> mRNA expression and growth kinetics in the absence of aTc for SprG1<sub>31</sub> mutants.** (A) *S. aureus* N315Δ*sprG1/sprF1* strains carrying pALC, pALCΩ*sprG1*<sub>312</sub>-STOP<sub>1</sub>/*sprF1*, pALCΩ*sprG1*<sub>312</sub>-STOP<sub>1</sub>-Δ9, pALCΩ*sprG1*<sub>312</sub>-STOP<sub>1</sub>-Δ2, pALCΩ*sprG1*<sub>312</sub>-STOP<sub>1</sub>-K2K3 or pALCΩ*sprG1*<sub>312</sub>-STOP<sub>1</sub>-F10E-F13E were cultivated in MH medium until exponential growth phase and incubated in the absence (-) or presence (+) of 0.25  $\mu$ M aTc. After RNA extraction, northern blot analysis was done on *sprG1*<sub>312</sub>, *sprG1*<sub>312</sub> mutants and SprF1 expression with 5S rRNA used as the loading control. (B) Growth kinetics of *S. aureus* N315Δ*sprG1/sprF1* strains carrying pALC, pALCΩ*sprG1*<sub>312</sub>-STOP<sub>1</sub>/*sprF1* (SprG1<sub>31</sub> + SprF1), pALCΩ*sprG1*<sub>312</sub>-STOP<sub>1</sub>-Δ9/*sprF1* (SprG1<sub>31</sub>Δ9 + SprF1), pALCΩ*sprG1*<sub>312</sub>-STOP<sub>1</sub>-Δ2/*sprF1* (SprG1<sub>31</sub>Δ2 + SprF1), pALCΩ*sprG1*<sub>312</sub>-STOP<sub>1</sub>-K2K3/*sprF1* (SprG1<sub>31</sub>-K2K3 + SprF1), pALCΩ*sprG1*<sub>312</sub>-STOP<sub>1</sub>-F10A-F13A/*sprF1* (SprG1<sub>31</sub>-F10A-F13A + SprF1) or pALCΩ*sprG1*<sub>312</sub>-STOP<sub>1</sub>-F10E-F13E/*sprF1* (SprG1<sub>31</sub>-F10E-F13E + SprF1) cultivated in MH medium in the absence of aTc. Error bars show the means and standard deviations of three biological replicates (n=3).

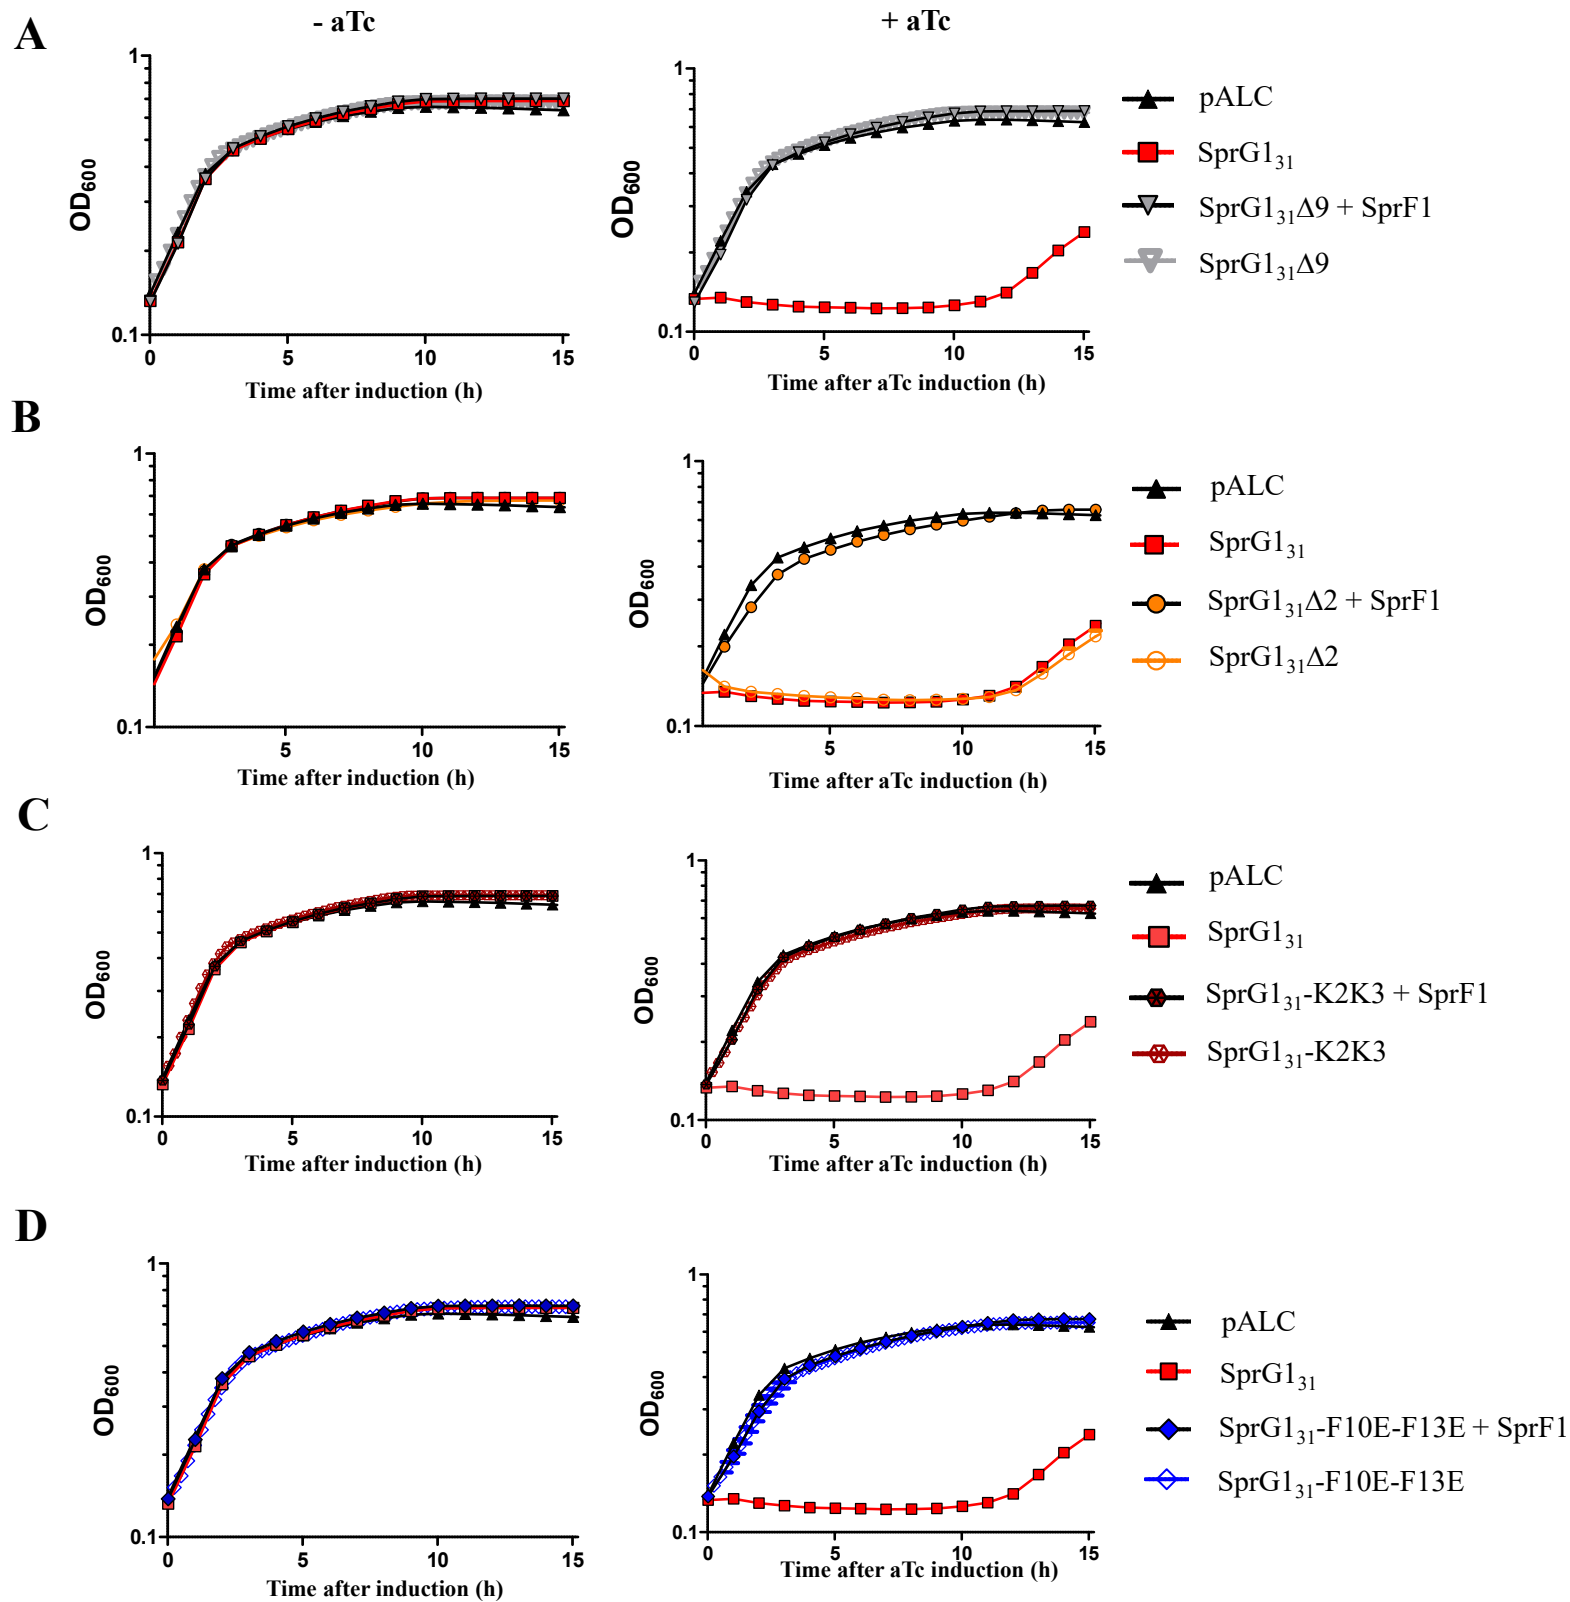

**Supplementary Figure 5: Growth kinetics of SprG<sub>131</sub> mutants in the absence or presence of SprF1 antitoxin.** (A) Growth kinetics of *S. aureus* N315Δ*sprG1/sprF1* strains carrying pALC, pALCΩ*sprG1<sub>312</sub>-STOP<sub>1</sub>/sprF1* (SprG<sub>131</sub>), pALCΩ*sprG1<sub>312</sub>-STOP<sub>1</sub>-Δ9/sprF1* (SprG<sub>131</sub>Δ9 + SprF1) or pALCΩ*sprG1<sub>312</sub>-STOP<sub>1</sub>-Δ9* (SprG<sub>131</sub>Δ9) cultivated in MH medium in the absence (-) or presence (+) of 0.25 μM aTc. (B) Growth kinetics of *S. aureus* N315Δ*sprG1/sprF1* strains carrying pALC, pALCΩ*sprG1<sub>312</sub>-STOP<sub>1</sub>/sprF1* (SprG<sub>131</sub>), pALCΩ*sprG1<sub>312</sub>-STOP<sub>1</sub>-Δ2/sprF1* (SprG<sub>131</sub>Δ2 + SprF1) or pALCΩ*sprG1<sub>312</sub>-STOP<sub>1</sub>-Δ2* (SprG<sub>131</sub>Δ2) cultivated in MH medium in the absence (-) or presence (+) of 0.25 μM aTc. (C) Growth kinetics of *S. aureus* N315Δ*sprG1/sprF1* strains carrying pALC, pALCΩ*sprG1<sub>312</sub>-STOP<sub>1</sub>/sprF1* (SprG<sub>131</sub>), pALCΩ*sprG1<sub>312</sub>-STOP<sub>1</sub>-K2K3/sprF1* (SprG<sub>131</sub>-K2K3 + SprF1) or pALCΩ*sprG1<sub>312</sub>-STOP<sub>1</sub>-K2K3* (SprG<sub>131</sub>-K2K3) cultivated in MH medium in the absence (-) or presence (+) of 0.25 μM aTc. (D) Growth kinetics of *S. aureus* N315Δ*sprG1/sprF1* strains carrying pALC, pALCΩ*sprG1<sub>312</sub>-STOP<sub>1</sub>/sprF1* (SprG<sub>131</sub>), pALCΩ*sprG1<sub>312</sub>-STOP<sub>1</sub>-F10E-F13E/sprF1* (SprG<sub>131</sub>-F10E-F13E + SprF1) or pALCΩ*sprG1<sub>312</sub>-STOP<sub>1</sub>-F10E-F13E* (SprG<sub>131</sub>-F10E-F13E) cultivated in MH medium in the absence (-) or presence (+) of 0.25 μM aTc. Error bars show the means and standard deviations of three biological replicates (n=3).

**A**

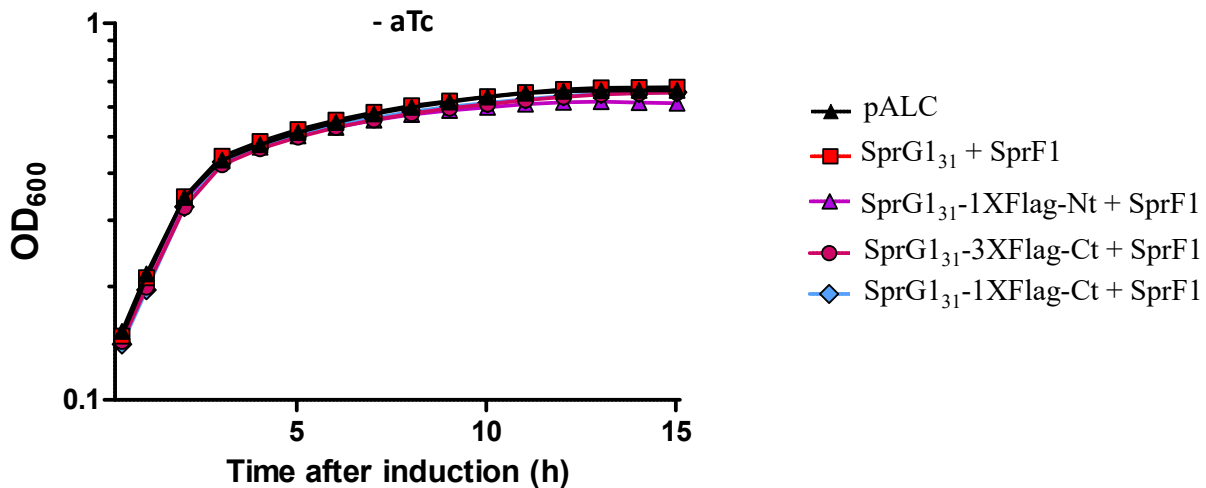

**B**

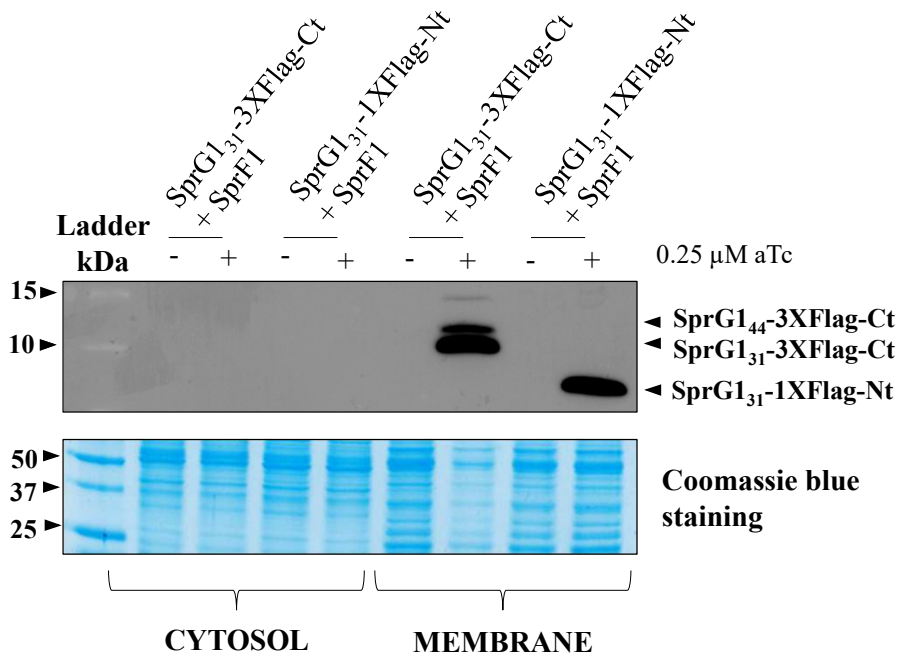

**Supplementary Figure 6: Growth kinetics and western blot analysis of flagged SprG1<sub>31</sub> mutants.** (A) Growth kinetics of *S. aureus* N315Δ*sprG1*/*sprF1* strains carrying pALC, pALCΩ*sprG1*<sub>312</sub>-STOP<sub>1</sub>/*sprF1* (SprG1<sub>31</sub> + SprF1), pALCΩ*sprG1*<sub>312</sub>-STOP<sub>1</sub>-1XFlag-Nt/*sprF1* (SprG1<sub>31</sub>-1XFlag-Nt + SprF1), pALCΩ*sprG1*<sub>312</sub>-STOP<sub>1</sub>-1XFlag-Ct/*sprF1* (SprG1<sub>31</sub>-1XFlag-Ct + SprF1) or pALCΩ*sprG1*<sub>312</sub>-STOP<sub>1</sub>-3XFlag-Ct/*sprF1* (SprG1<sub>31</sub>-3XFlag-Ct + SprF1) cultivated in MH medium in the absence of aTc. Error bars show the means and standard deviations of three biological replicates (n=3). (B) *S. aureus* N315Δ*sprG1*/*sprF1* strains carrying pALCΩ*sprG1*<sub>312</sub>-3XFlag-Ct-STOP<sub>1</sub>/*sprF1* (SprG1<sub>31</sub>-3XFlag-Ct + SprF1) or pALCΩ*sprG1*<sub>312</sub>-STOP<sub>1</sub>-1XFlag-Nt/*sprF1* (SprG1<sub>31</sub>-1XFlag-Nt + SprF1) were cultivated in MH medium until exponential growth phase and incubated in the absence (-) or presence (+) of 0.25 μM aTc. After cell fractionation, the expression of the *sprG1*<sub>312</sub>-encoded flagged peptides, SprG1<sub>44</sub>-3XFlag-Ct, SprG1<sub>31</sub>-3XFlag-Ct and SprG1<sub>31</sub>-1XFlag-Nt, was analyzed by western blot by using anti-FLAG antibodies. Coomassie blue staining was used as the loading control.

A

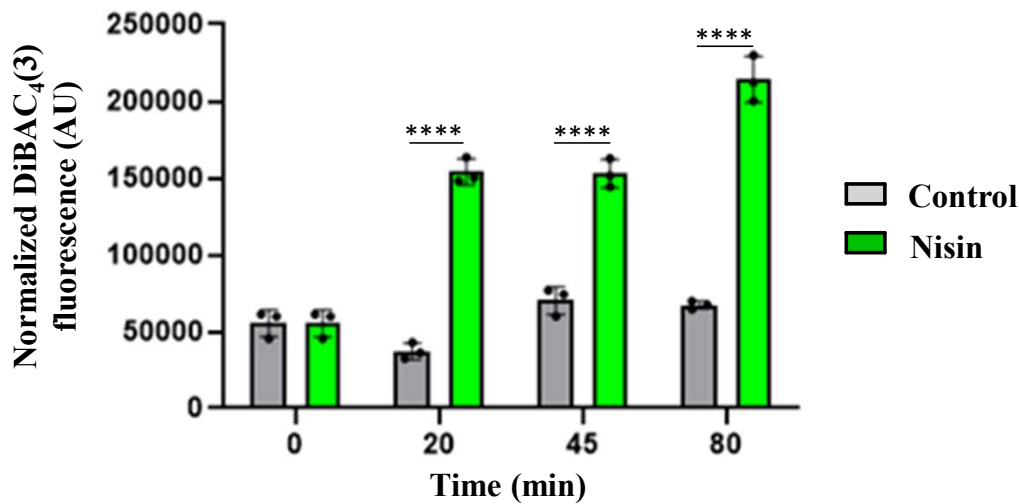

B

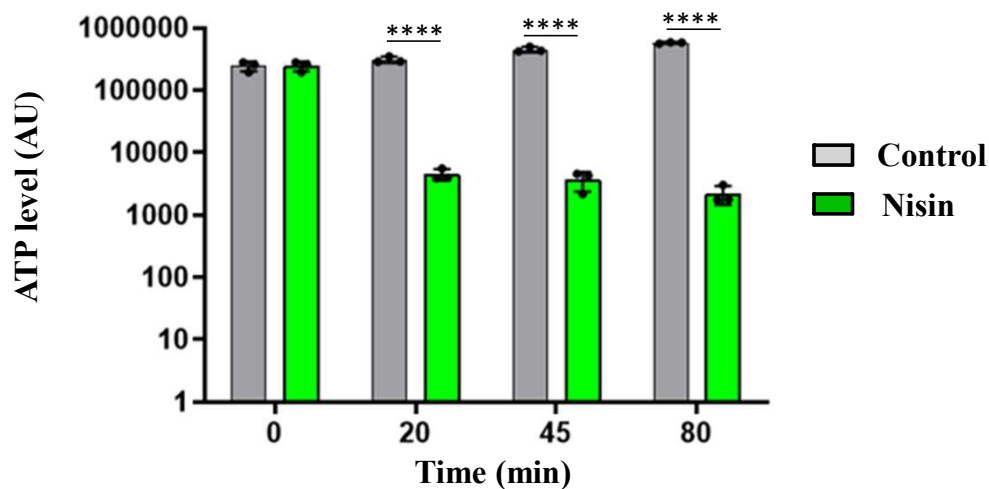

C

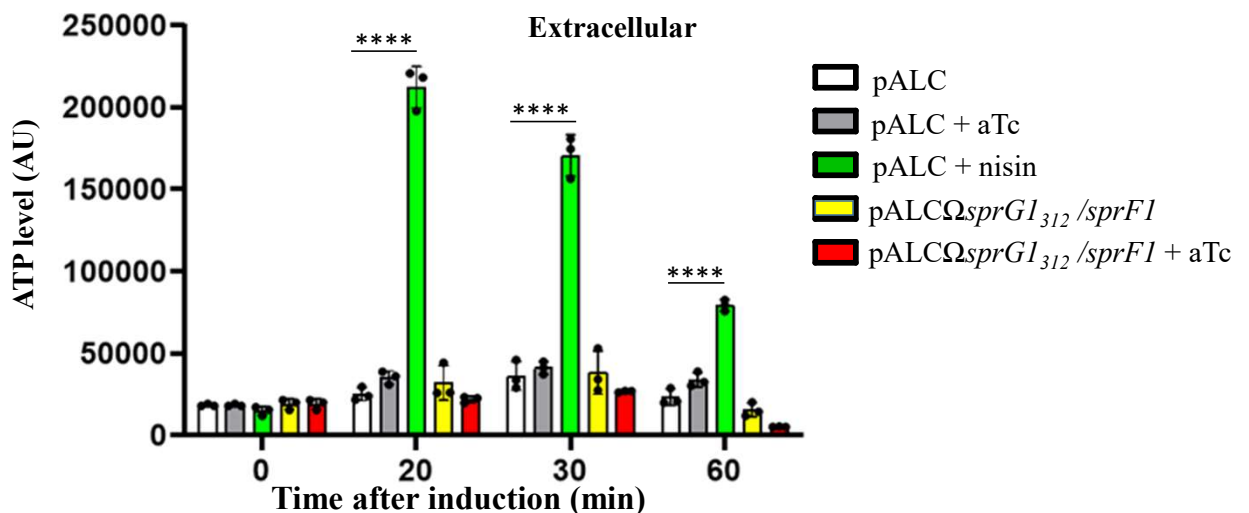

**Supplementary Figure 7: The pore-forming peptide nisin causes *Staphylococcus aureus* membrane depolarization followed by an intracellular ATP drop and an increase of ATP leakage into the extracellular medium.** (A-B) *S. aureus* N315Δ*sprG1/sprF1* strains carrying pALC was cultivated in MH medium until the exponential growth phase and incubated in absence (Control) or presence of 12.5 μg/mL nisin. (A) At each time point, bacteria were resuspended in PBS and stained with 0.5 μg/mL DiBAC<sub>4</sub>(3). DiBAC<sub>4</sub>(3) fluorescence was measured in a microplate reader and normalized with OD<sub>600</sub>. (B) At each time point, bacteria were resuspended in MH and incubated with BacTiter-Glo Microbial Cell Viability Assay. Luminescence values were normalized with OD<sub>600</sub>. (C) *S. aureus* N315Δ*sprG1/sprF1* strains carrying pALC and pALCΩ*sprG1*<sub>312</sub>/*sprF1* were cultivated in MH medium until the exponential growth phase and incubated in absence or presence of 0.25 μM aTc or 12.5 μg/mL nisin used as the positive control. At each time point, supernatants (extracellular fraction) were incubated with BacTiter-Glo Microbial Cell Viability Assay. Luminescence values normalized with OD<sub>600</sub>. Error bars show the means and standard deviations of three biological replicates (n=3). Statistical significance was calculated with the two-way ANOVA with Tukey's correction. \*\*\*\**P*<0.0001. AU refers to arbitrary unit.

**A**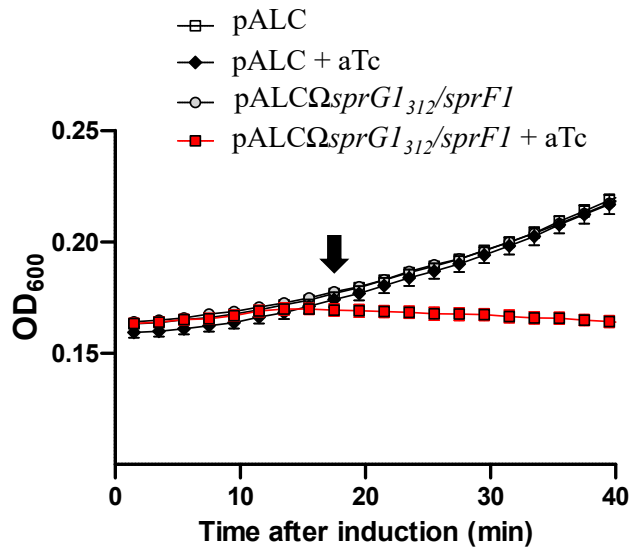**B**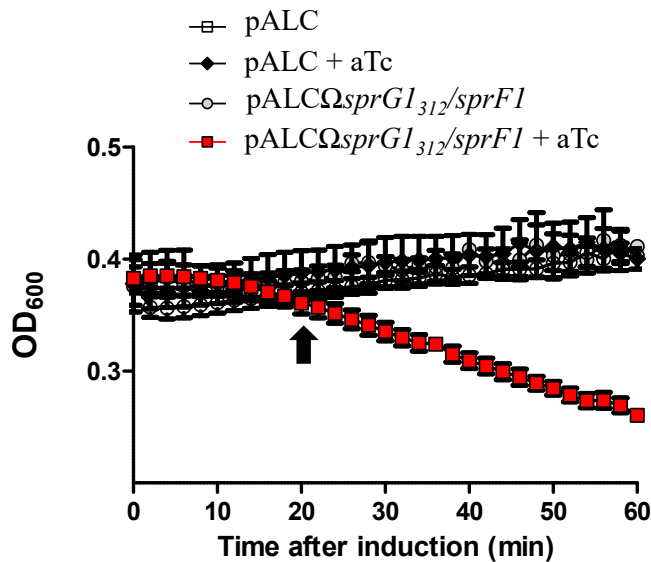

**Supplementary Figure 8: SprG1<sub>44</sub> and SprG1<sub>31</sub> arrest the growth of *Staphylococcus aureus* within 20 minutes after overexpression.** (A) *S. aureus* N315ΔsprG1/sprF1 strains carrying pALC and pALCΩsprG1<sub>312</sub>/sprF1 were cultivated in MH medium until the exponential growth phase and incubated in absence or presence of 0.25 μM aTc. (B) *S. aureus* N315ΔsprG1/sprF1 strains carrying pALC or pALCΩsprG1<sub>312</sub>/sprF1 were cultivated in MH medium until the exponential growth phase, resuspended in PBS supplemented with 25 mM glucose and incubated in absence or presence of 0.25 μM aTc. (A-B) OD<sub>600</sub> was measured in a microplate reader. The results are expressed as the mean ± SD of three biological replicates (n=3). Arrows indicate the time for which the *S. aureus* growth is inhibited by the overexpression of SprG1<sub>44</sub> and SprG1<sub>31</sub>.

**A**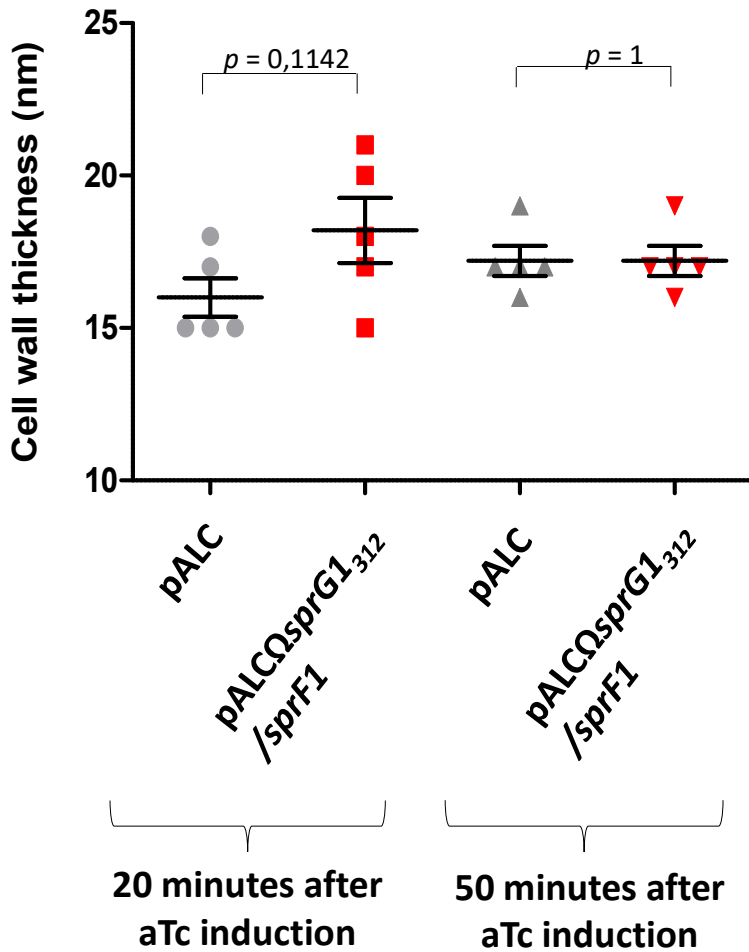**B**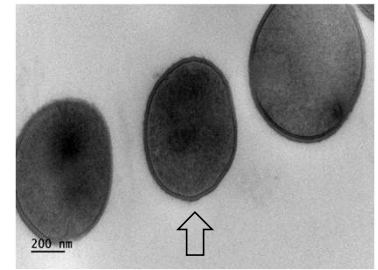**C**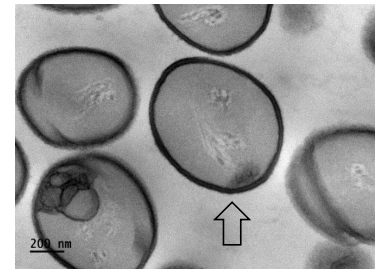

**Supplementary Figure 9: Measurement of cell wall thickness by transmission electron microscopy.** *S. aureus* N315 $\Delta$ sprG1/sprF1 strains carrying pALC or pALC $\Delta$ sprG1<sub>312</sub>/sprF1 were cultivated in MH medium until the exponential growth phase and incubated with 0.25  $\mu$ M aTc during 20 or 50 min. (A) Cell wall thickness of *S. aureus* was measured using transmission electron microscopy. The results are expressed as the mean  $\pm$  SD of 5 representative bacteria. *P* values inferred using the Student's *t*-test. (B-C) Captions of representative bacteria (arrow) carrying pALC (B) or pALC $\Delta$ sprG1<sub>312</sub>/sprF1 (C) 20 minutes after aTc induction.

## Supplemental references

Bateman, B. T., Donegan, N. P., Jarry, T. M., Palma, M. & Cheung, A. L. (2001). Evaluation of a Tetracycline-Inducible Promoter in *Staphylococcus aureus* In Vitro and In Vivo and Its Application in Demonstrating the Role of *sigB* in Microcolony Formation. (E.I. Tuomanen, Hrsg.) *Infection and Immunity*, 69 (12), 7851–7857. doi:10.1128/IAI.69.12.7851-7857.2001

Kreiswirth, B. N., Löfdahl, S., Betley, M. J., O'Reilly, M., Schlievert, P. M., Bergdoll, M. S. et al. (1983). The toxic shock syndrome exotoxin structural gene is not detectably transmitted by a prophage. *Nature*, 305 (5936), 709–712. doi:10.1038/305709a0

Okonogi, K., Noji, Y., Kondo, M., Imada, A. & Yokota, T. (1989). Emergence of methicillin-resistant clones from cephamycin-resistant *Staphylococcus aureus*. *Journal of Antimicrobial Chemotherapy*, 24 (5), 637–645. doi:10.1093/jac/24.5.637

Pinel-Marie, M.-L., Brielle, R. & Felden, B. (2014). Dual Toxic-Peptide-Coding *Staphylococcus aureus* RNA under Antisense Regulation Targets Host Cells and Bacterial Rivals Unequally. *Cell Reports*, 7 (2), 424–435. doi:10.1016/j.celrep.2014.03.012
